# Supplementary material
Source: Springer Nature journal article supplement (https://www.springermedizin.de/resource/supplementary/13054_2009_8421_MOESM2_ESM.pdf/9731924)

**(a)**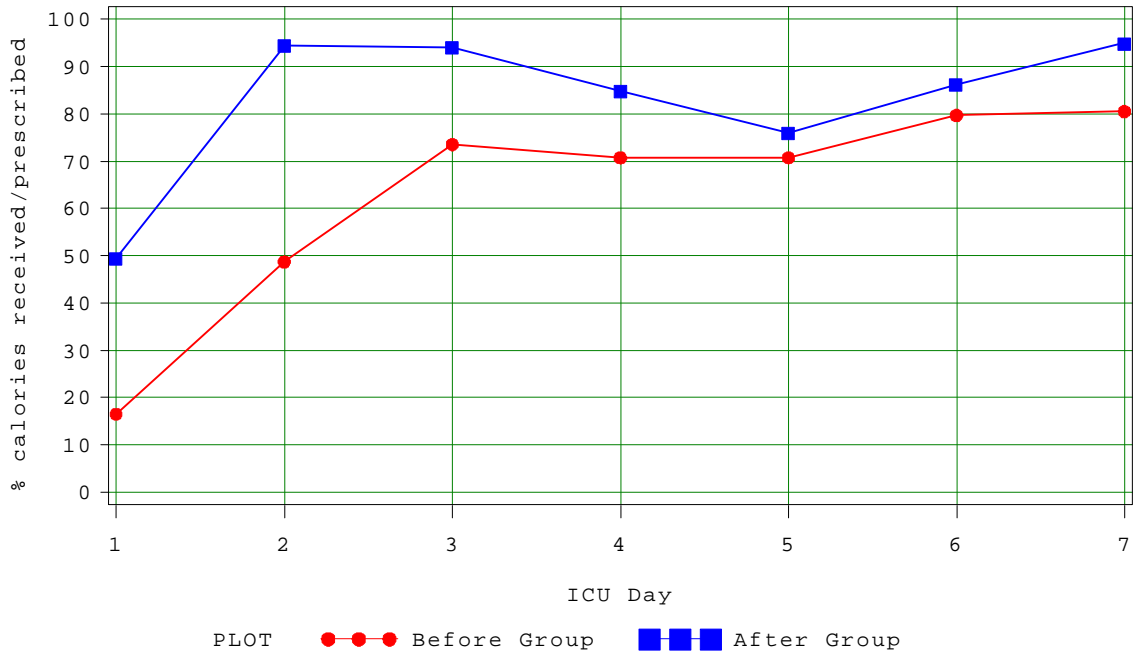

|                | Day 1 | Day 2  | Day 3 | Day 4 | Day 5 | Day 6 | Day 7 | Total |
|----------------|-------|--------|-------|-------|-------|-------|-------|-------|
| <b>P-value</b> | 0.049 | 0.0005 | 0.17  | 0.31  | 0.60  | 0.34  | 0.20  | 0.015 |

**(b)**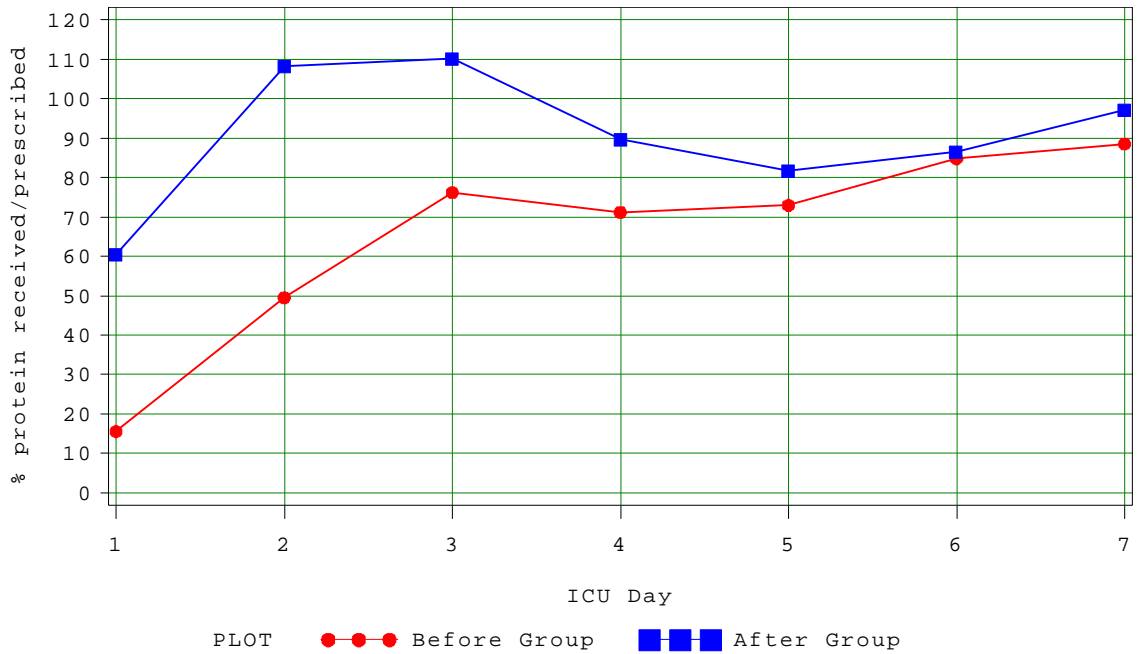

|                | Day 1 | Day 2   | Day 3  | Day 4 | Day 5 | Day 6 | Day 7 | Total |
|----------------|-------|---------|--------|-------|-------|-------|-------|-------|
| <b>P-value</b> | 0.014 | <0.0001 | 0.0015 | 0.13  | 0.57  | 0.62  | 0.34  | 0.002 |

Supplement: MOESM2 [file 9731924]
